# Supplementary material for: Trajectory analysis of metabolomics profiling in liver injured rats using ultra-performance liquid chromatography coupled with mass spectrometry
Source: Royal Society of Chemistry journal article supplement (doi:10.1039/c3ay40578h), 2013-01-01
Supplement: c3ay40578h.pdf [file c3ay40578h.pdf]

**Table 1.** Potential metabolites identified in urine of HI rats.

| No | Retention time | Measured [M+H] <sup>+</sup> | Theoretical [M+H] <sup>+</sup> | Error (ppm) | Elemental composition                                         | Identified Metabolites                                        | Trend |
|----|----------------|-----------------------------|--------------------------------|-------------|---------------------------------------------------------------|---------------------------------------------------------------|-------|
| 1  | 0.54           | 132.0761                    | 132.0780                       | -1.9        | C <sub>5</sub> H <sub>9</sub> NO <sub>3</sub>                 | 4-Hydroxy-L-proline                                           | ↑     |
| 2  | 0.90           | 166.0718                    | 166.0729                       | -1.1        | C <sub>6</sub> H <sub>7</sub> N <sub>5</sub> O                | N-Methylguanine                                               | ↑     |
| 3  | 0.99           | 301.1505                    | 301.1512                       | -0.7        | C <sub>12</sub> H <sub>20</sub> N <sub>4</sub> O <sub>5</sub> | —                                                             | ↓     |
| 4  | 1.09           | 271.1395                    | 271.1393                       | 0.2         | C <sub>10</sub> H <sub>22</sub> O <sub>8</sub>                | 1,5-bis(2-hydroxyethoxy)-3-(hydroxymethyl)pentane-2,3,4-triol | ↓     |
| 5  | 1.14           | 267.1336                    | 267.1340                       | -0.4        | C <sub>14</sub> H <sub>18</sub> O <sub>5</sub>                | 2-((Hexyloxy)carbonyloxy)benzoic acid                         | ↓     |
| 6  | 1.23           | 229.1534                    | 229.1552                       | -1.8        | C <sub>11</sub> H <sub>20</sub> N <sub>2</sub> O <sub>3</sub> | L-leucyl-L-proline                                            | ↑     |
| 7  | 1.37           | 285.0748                    | 285.0763                       | -1.5        | C <sub>16</sub> H <sub>12</sub> O <sub>5</sub>                | —                                                             | ↓     |
| 8  | 2.04           | 190.0492                    | 190.0504                       | -1.2        | C <sub>10</sub> H <sub>7</sub> NO <sub>3</sub>                | Kynurenic acid                                                | ↑     |
| 9  | 2.59           | 237.1234                    | 237.1239                       | -0.5        | C <sub>12</sub> H <sub>16</sub> N <sub>2</sub> O <sub>3</sub> | Alanyl-dl-phenylalanine                                       | ↓     |
| 10 | 2.59           | 279.1334                    | 279.1345                       | -1.1        | C <sub>14</sub> H <sub>18</sub> N <sub>2</sub> O <sub>4</sub> | alpha-Ribazole                                                | ↓     |
| 11 | 2.63           | 162.0546                    | 162.0555                       | -0.9        | C <sub>9</sub> H <sub>7</sub> NO <sub>2</sub>                 | 4,6-Dihydroxy quinoline                                       | ↓     |
| 12 | 3.30           | 239.1379                    | 239.1396                       | -1.7        | C <sub>12</sub> H <sub>18</sub> N <sub>2</sub> O <sub>3</sub> | 2-dimethylaminoethyl N-(2-methoxyphenyl)carbamate             | ↓     |
| 13 | 5.03           | 355.2628                    | 355.2637                       | -0.9        | C <sub>24</sub> H <sub>34</sub> O <sub>2</sub>                | 2-naphthyl tetradecanoate                                     | ↑     |
| 14 | 5.39           | 466.3155                    | 466.3169                       | -1.4        | C <sub>26</sub> H <sub>43</sub> NO <sub>6</sub>               | Glycocholic acid                                              | ↑     |
| 15 | 5.56           | 353.2467                    | 353.2481                       | -1.4        | C <sub>24</sub> H <sub>32</sub> O <sub>2</sub>                | phenyl octadeca-10,12-diynoate                                | ↑     |
| 16 | 6.13           | 373.2735                    | 373.2743                       | -0.8        | C <sub>24</sub> H <sub>36</sub> O <sub>3</sub>                | 1-hexylundeca-3,9-dienyl-2-hydroxybenzoate                    | ↑     |
| 17 | 6.16           | 274.2738                    | 274.2746                       | -0.8        | C <sub>16</sub> H <sub>31</sub> NO <sub>2</sub>               | —                                                             | ↓     |
| 18 | 6.14           | 355.2630                    | 355.2637                       | -0.7        | C <sub>24</sub> H <sub>34</sub> O <sub>2</sub>                | 1-(2-hydroxy-1-naphthyl)tetradecan-1-one                      | ↑     |
| 19 | 6.21           | 318.2996                    | 318.3008                       | -1.2        | C <sub>16</sub> H <sub>31</sub> NO <sub>5</sub>               | —                                                             | ↓     |
| 20 | 6.97           | 251.1633                    | 251.1647                       | -1.4        | C <sub>15</sub> H <sub>22</sub> O <sub>3</sub>                | —                                                             | ↑     |

**Note:** ↑ , content increased; ↓ , content decreased;
